# Supplementary material for: Stimulated-source-independent persistent luminescence phosphor Sr2Ta2O7:Tb3+, Tm3+ for multi-mode anti-counterfeiting applications
Source: Royal Society of Chemistry journal article supplement (doi:10.1039/d4tc00732h), 2024-01-01
Supplement: d4tc00732h1.pdf [file d4tc00732h1.pdf]

## Supporting Information

### Stimulated-source-independent Persistent Luminescence Phosphor $\text{Sr}_2\text{Ta}_2\text{O}_7:\text{Tb}^{3+}, \text{Tm}^{3+}$ for Multi-mode Anti-counterfeiting Applications

Zexun Li<sup>a</sup>, Jinqiang Xiang<sup>\*a</sup>, Changheng Chen<sup>a</sup>, Ziyang Wu<sup>a</sup>, Minkun Jin<sup>a</sup>, Xiaoqi Zhao<sup>b</sup>, Lei  
Zhao<sup>b</sup>, Chongfeng Guo<sup>\*a</sup>

<sup>a</sup> State Key Laboratory of Photon-Technology in Western China Energy, Institute of Photonics & Photon-Technology, Northwest University, Xi'an 710069, China;

<sup>b</sup> School of Physics and Opto-Electronic Technology, Baoji University of Arts and Sciences, Baoji, Shaanxi, 721016, China

-----  
\*Author to whom correspondence should be addressed

E-mail: guocf@nwu.edu.cn (Prof. Guo);

Tel & Fax: ±86-29-88302661

| Occupied sites | $R_{host}$ (Å) | $R_{atom}$ (Å) | $\Delta R$ (%) |
|----------------|----------------|----------------|----------------|
| Tb → Sr        | 1.18           | 0.92           | 22.03          |
| Tb → Ta        | 0.64           | 0.92           | 43.75          |
| Tm → Sr        | 1.18           | 0.88           | 25.42          |
| Tm → Ta        | 0.64           | 0.88           | 37.50          |

**Table S1** Ions radius difference between cations of host and  $\text{Tb}^{3+}/\text{Tm}^{3+}$ (CN=6).

| Occupied sites       | $E_T(doped)$ (eV) | $E_T(bulk)$ (eV) | $E_{atom}$ (eV) | $E_{dopant}$ (eV) | $E_{form}$ (eV) |
|----------------------|-------------------|------------------|-----------------|-------------------|-----------------|
| Tb $\rightarrow$ Sr1 | -193.45           | -190.62          | -1.63           | -4.55             | -0.14           |
| Tb $\rightarrow$ Sr2 | -192.60           | -190.62          | -1.63           | -4.55             | 0.94            |
| Tb $\rightarrow$ Ta  | -178.42           | -190.62          | -11.81          | -4.55             | 4.94            |
| Tm $\rightarrow$ Sr1 | -193.22           | -190.62          | -1.63           | -4.45             | 0.21            |
| Tm $\rightarrow$ Sr2 | -192.19           | -190.62          | -1.63           | -4.45             | 1.24            |
| Tm $\rightarrow$ Ta  | -179.02           | -190.62          | -11.81          | -4.45             | 4.23            |

**Table S2** Formation energy as Tb<sup>3+</sup>/Tm<sup>3+</sup> occupy different cations in STO.

| doped ions | Bond length 1 (Å) | Bond length 2 (Å) | Bond length 3 (Å) | Bond length 4 (Å) | Bond length 5 (Å) | Bond length 6 (Å) | Average bond length (Å) | Distortion ( $\Delta d$ ) |
|------------|-------------------|-------------------|-------------------|-------------------|-------------------|-------------------|-------------------------|---------------------------|
| Tb         | 2.3069            | 2.3069            | 2.3069            | 2.3069            | 2.2769            | 2.2769            | 2.2969                  | 3.0625                    |
| Tb, Tm     | 2.3383            | 2.3383            | 2.3383            | 2.3383            | 2.2820            | 2.2820            | 2.3195                  | 5.7968                    |

**Table S3** Different co-doped ions lead to distortion **degree** comparison of Tb<sup>3+</sup> sites.

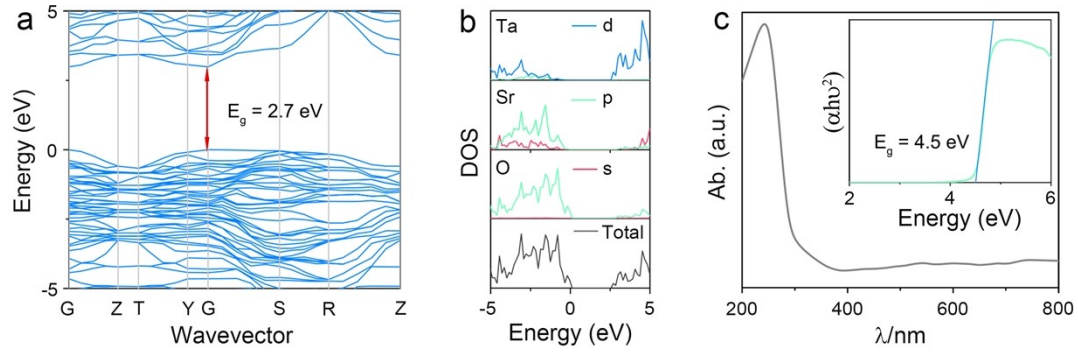

**Fig. S1** (a) The band structure, (b) PDOS and (c) the absorption spectrum as well as the Tauc curve of STO.

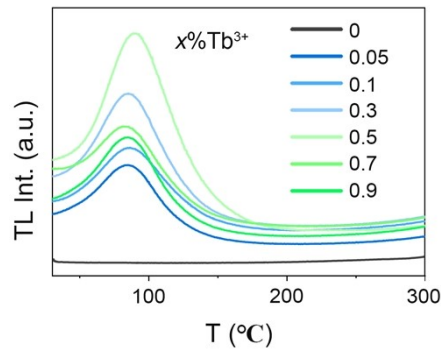

**Fig. S2** The TL curves of  $\text{STO}:x\%\text{Tb}^{3+}$  ( $x = 0, 0.05, 0.1, 0.3, 0.5, 0.7, 0.9$ ).

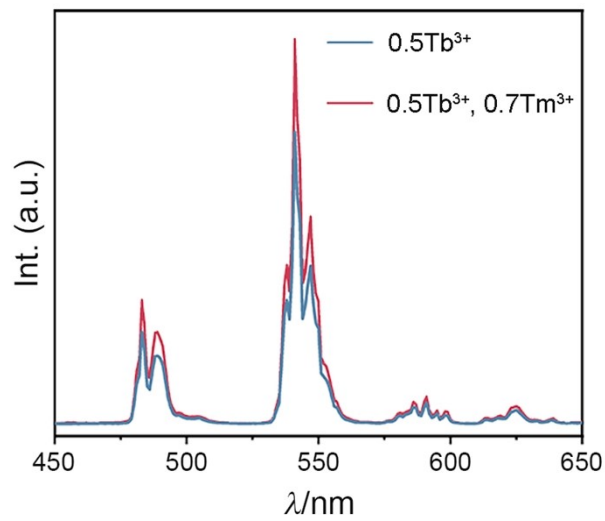

**Fig. S3** PL spectra of  $\text{STO}:0.5\%\text{Tb}^{3+}$  and  $\text{STO}:0.5\%\text{Tb}^{3+}, 0.7\%\text{Tm}^{3+}$  phosphors under the excitation of 262 nm.

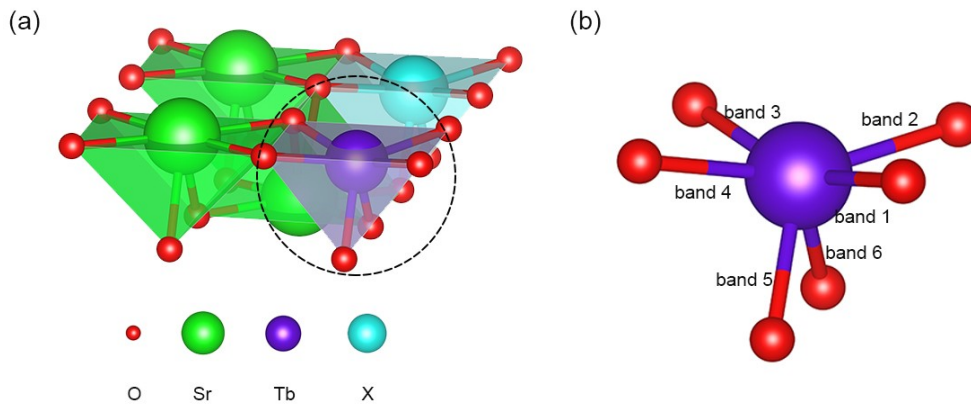

**Fig. S4** (a) Enlarged view of STO crystal structure (X=Tm, Sr). (b) Enlarged view of Tb occupied site.

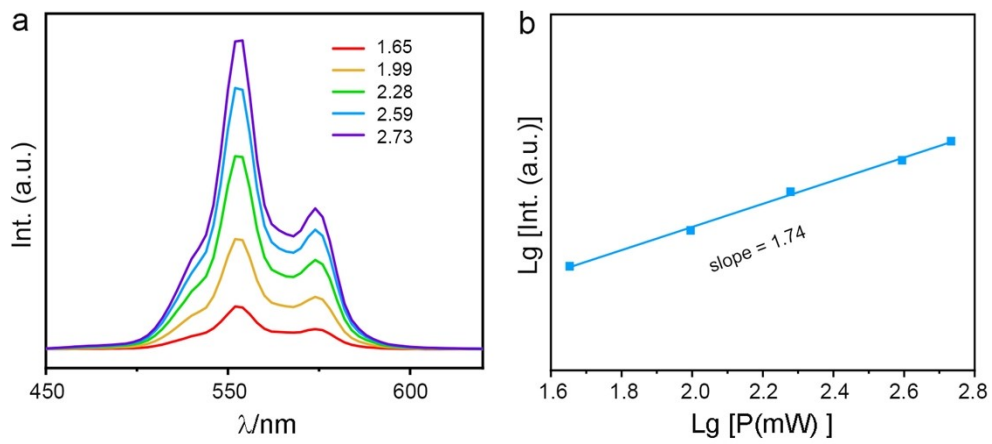

**Fig. S5** (a) The PL spectra under variable excitation power of 808 nm NIR laser. (b) Dual logarithmic plots of UC emission intensity *versus* pumping power of STO: Tb<sup>3+</sup>, Tm<sup>3+</sup>.
